# Supplementary material for: Text messages as a tool to improve cardiovascular disease risk factors control: A Systematic Review and Meta-Analysis
Source: Research Square preprint supplement (doi:10.21203/rs.3.rs-5112776/v1), 2024-12-16
Supplement: Supplementary file 1 [file 2b28544765159976b67eee2e.xlsx]

## Sheet: Sheet1
Table 1. Included Studies in Systematic Review: Intervention Outcomes and key points
Author and Year	Country	Age	Sample Size (total)	Time of intervention	Type of SMS	Type of transmission	Total number of SMS per person	Frequency of SMS	Intervention	Control	Who send the message	Result
Kamal a, 2015(11)	Pakistan	Intervention: 56. Comparator: 57.6	326	2 months	Medication reminders and education	Two-ways text messaging	76	Reminder to medication=Daily. Health information=Twice a week	SMS reminders on medication	Usual care	Not specified	There is no statistically significant difference noted between groups, but clinically medication adherence improved in stroke patients.
Anand S, 2016(17)	Canada	Control: 50.6 )10.9) Cases: 50.6 (12)	343	12 months	Motivational messages and health tips	One-way text messaging	54	Weekly	Digital health intervention focused on improving diet and physical activity to reduce MI risk	Usual care	Automated system	No significant difference in myocardial infarction (MI) risk score change was observed. Additionally, knowing genetic risk status at baseline did not affect the MI risk score change.
Dale L, 2015a(27)	New Zealand	Control: 59.9 (11.8) Intervention: 59 (10.5)	123	6 months	Comprehensive cardiac rehabilitation program	Two-ways text messaging	168	Daily for first 12 weeks, 5 times per week for the next 12 weeks	Personalized program framed in social cognitive theory to improve adherence to recommended lifestyle behaviors	Usual care	Automated system	Text-messaging intervention helps to increase physical activity.
Sadeghioan S, 2017(19)	Iran	Intervention: 41.99(0.17) Control: 40.15 (12.42)	3600	2 weeks	Cognitive learning, affective learning, Psychomotor-based approach text	One-way text messaging	15	Every 2 weeks	SMS reminders on cholesterol screening	Usual care	Tehran Heart Center	SMS could affect people’s adherence to preventive programs. Female respondents were more aware of their cholesterol level and checked their blood cholesterol levels twice as much as male participants.
Tam H, 2023(9)	China	Control: 67.97 (9.5) Cases: 66.82 (10.5)	69	3 months	Motivational messages and health tips	One-way text messaging	12	Weekly	Educational program based on Health Promotion Model including health education session, leaflet, and text messages on hypertension management	Usual care	Automated system	Compared with the control group, the text messages in the intervention group produced a small-to-moderate effect size to reduce SBP, a moderate effect size to reduce pulse pressure, and a very small effect size on the remaining outcomes.
Khonsari S, 2014(20)	Malaysia	Total: 57.9 (12.64)	62	2 months	Medication reminders	One-way text messaging	No specific per person	Before every medication intake	Automated SMS reminders for medication adherence	Usual care	Automated system	Participants in the intervention group had a high medication adherence level compared to the usual care group.
Chow C, 2015(21)	Australia	Control: 57.3 (9.3) cases: 57.9 (9.1)	710	6 months	Lifestyle text messages	One-way text messaging	96	4 per week	Support for lifestyle changes, non-interactive	Usual care	Automated system	LDL-C level, systolic blood pressure, smoking and BMI were all significantly lower in the intervention group compared with the control group.
Bhandari B, 2022(22)	Nepal	Total: 50.5	200	3 months	Medication reminders and education	One-way text messaging	36	3 times per week	Text messages on hypertension management, medication adherence, and lifestyle advice	Usual care	Automated system	The intervention group yielded substantial reductions in both systolic and diastolic blood pressure, improvements in medication adherence, self-efficacy concerning medication management, and knowledge about hypertension.
Foccardi G, 2021(23)	Italy	Control 61.1 (10.6) Cases (61.4 (8.9)	32	3 months	Physical activity reminder	One-way text messaging	90	Daily	Text reminders to maintain physical activity	Usual care	Not specified	The intervention group had an increase in moderate physical activity and reduced sedentary time compared to the control group. Additionally, showed improvements in heart rate, blood pressure, and exercise performance (p < 0.05).
Byrne J, 2020(24)	Uk	Control: 63.9 (6.9) Cases (63.9 (SD 7.5)	212	12 months	Medication reminders and motivational messages	Two-ways text messaging	44	Daily medication reminders, lifestyle advice	Text reminders to take medication and lifestyle advice	Usual care	Automated system	The intervention group showed improvements in diastolic blood pressure (p = 0.002) and waist circumference (p = 0.012), along with greater perceived control of treatment and understanding of the condition.
Park L, 2014(25)	USA	Intervention: 58.2 (SD 10.6), Education: 58.3 (SD 8.5), No TM: 61.1 (SD 9.1)	90	1 month	Medication reminders and education	Two-ways text messaging	42	Daily medication reminders, 3 health messages per week	Text messages for medication adherence and health education	Usual care	Automated system	Medication self-efficacy improved over 30 days; however, there was no significant difference in this improvement of the different groups (p=0.64).
Wald D, 2014(26)	UK	Total:60 (54-68)	303	6 months	Medication reminders	Two-ways text messaging	44	Daily for 2 weeks, then alternate days for 2 weeks, then weekly for 22 weeks	Text reminders to take medication, asking patients to reply if they had taken their medication	Usual care	Automated system	Among patients taking blood pressure and/or lipid-lowering treatment for the prevention of cardiovascular disease events, text messaging improved the extent to which patients took their prescribed medication.
Dale L, 2015b(18)	New Zealand	Control: 63.7(7.44). Cases: 61.38 (8.98)	171	6 months	Exercise prescription and behavior change	One-way text messaging	27	Weekly	Theory-based, automated package of exercise prescription and behavior change text messages and a supporting Web site	Usual care	Automated system	The intervention group reported significantly greater medication adherence and most of intervention participants reported reading all their text messages.
Klimis H, 2021(12)	Australia	Control: 58.7 (11) Cases: 58.5 (10.4)	246	6 months	Motivational and supportive messages	One-way text messaging	100	4 messages per week	Motivational and supportive messages on diet, physical activity, smoking, general cardiovascular health, and medication adherence	Usual care	Automated system	Intervention participants were less likely to be physically inactive, but there were no significant changes in other single cardiovascular risk factor (CVRF).
Chow C, 2022(28)	Australia	Control: 58 (10.9) cases (58 (10.4)	1424	12 months	Motivational and supportive messages	Two-ways text messaging	192	4 messages per week for 6 months, 3 messages per week for 6 months	Motivational and supportive messages on medications and healthy lifestyle with the opportunity for 2-way communication (text or telephone)	Usual care	Automated system	No difference was found between intervention and control groups at 12 months in adherence to individual medications, systolic blood pressure, low-density lipoprotein cholesterol, smoking, or exercising regularly.
Kes D, 2021(30)	Turkey	Control: 52.2 (6.2) Intervention: 54.9(6.6)	77	3 months	Medication reminders and education	One-way text messaging	154	2 messages per week for 12 weeks	Nurse-led telephone support and SMS reminders for medication adherence and BP control	Usual care	Nurse-led	Medication adherence was found to be significantly higher in the intervention group. Mean systolic and diastolic BP levels were statistically significantly lower in the intervention group than in the control group.
Santo K, 2018(31)	Australia	Control: 57.2 (9.64) Cases:(57.9 (8.77)	710	6 months	Lifestyle text messages	One-way text messaging	96	Four messages per week	Motivational reminders and advice on diet and lifestyle	Usual care	Not specified	There were no significant differences on adherence to ≥ 4 dietary guideline recommendations across the subgroups tested (by age, sex, education, BMI, smoking and cardiac rehabilitation attendance).
Duscha, B, 2018(32)	USA	Controls: 66.5 (7.2) Cases: 59.9 (8.1)	25	3 months	Excercise and health coaching	Two-ways text messaging	12	Weekly	Program using physical activity trackers and health coaching following CR graduation	Usual care	Not specified	A 12-week mHealth program sustained the gains in peak VO2 and physical activity achieved by site-based CR. Usual care group showed a decrease in physical activity and fitness
Song Y, 2019(33)	China	Controls: 54.8 (9.13) Cases: 54.17(8.76)	96	6 months	Exercise prescription and feedback	Two-ways text messaging	27	Weekly	Telemonitored exercise rehabilitation including exercise prescription and weekly feedback on exercise performance	Usual care	Automated system	Telemonitored exercise rehabilitation significantly improved exercise tolerance and compliance.
Kiselev A, 2012(34)	Russia	Control: 51(11) Intervention: 49(11)	199	12 months	Medication reminders and Lifestyle focused support	Two-ways text messaging	365	Reminder to medication=Daily. Health/lifestyle information= weekly	Text reminders to take medication, collection of data BP, BMI, No. of cigarettes, scheduling visit	Usual care	Automated system	Automated SMS improved medication adherence and health outcomes like reduction of smoking in participants compared to usual care
Golshahi J, 2015(35)	Iran	Control: 57.51 (8.5) Intervention 56.76 (8.9)	90	6 months	Lifestyle text messages	One-way text messaging	27	Weekly	Text reminders to maintain physical activity, diet and stop smoking	Usual care	Not specified	SMS could not affect favorably on lifestyle changes and hypertension control
Bobrow K, 2014(36)	South Africa	Control: 54.7 (11.6) Intervention 53.9 (11.2)	914	12 months	Informational and interactive	Two-ways text messaging	54	Weekly	Written information about hypertension and healthy living	Usual care	Not specified	A small reduction in systolic blood pressure control was found in SMS group compared with usual care at 12 months.
Caption: MI - Myocardial Infarction, SMS- Short Message Service, SBP -Systolic Blood Pressure, DBP – Diastolic Blood Pressure, LDL-C – Low-Density Lipoprotein- cholesterol, BMI- Body Mass Index, CVRF- Cardiovascular Risk Factor, BP- Blood Pressure, mHealth- mobile health, VO2 – maximal oxygen consumption, CR- Cardiac Rehabilitation
