# Supplementary material for: Text messages as a tool to improve cardiovascular disease risk factors control: A Systematic Review and Meta-Analysis
Source: Research Square preprint supplement (doi:10.21203/rs.3.rs-5112776/v1), 2024-12-16
Supplement: Supplementary file 2 [file a68d75224735e7a299ddfe68.docx]

SUPPLEMENTARY MATERIAL

Table 2. Pubmed Search

| SEARCH | RESULTS |
| --- | --- |
| (((Cardiovascular Diseases [Mesh]) OR (Cardiovascular Diseases [Title/Abstract]) OR (Heart Diseases [Mesh]) OR (Heart Diseases [Title/Abstract]) OR (Vascular Diseases [Mesh]) OR (Vascular Diseases [Title/Abstract]) OR (Cardiovascular System [Mesh]) OR (Cardiovascular [Title/Abstract]) OR (Cardio* [Title/Abstract]) OR (Vascular [Title/Abstract])) AND ((Text Messaging [Mesh]) OR (Text Messaging [Title/Abstract]) OR (Short Message Service [Mesh]) OR (Short Message Service [Title/Abstract]) OR (Cellular Phone [Mesh]) OR (Cellular Phone [Title/Abstract]) OR (text [Title/Abstract]) OR (messages [Title/Abstract])) AND ((Prevention [Mesh]) OR (Prevention [Title/Abstract]) OR (Risk Reduction Behavior [Mesh]) OR (Risk Reduction Behavior [Title/Abstract]))) | 1,125 |

Table 3. Scopus Search

| SEARCH | RESULT |
| --- | --- |
| TITLE-ABS-KEY (text messaging AND cardiovascular disease AND intervention AND prevention) | 74 |

Table 4. Web of Science Search

| ID | SEARCH | RESULT |
| --- | --- | --- |
| 1 | ALL=(text messaging) | 19,954 |
| 2 | ALL=(SMS) | 33,263 |
| 3 | ALL=(mobile messaging) | 23,450 |
| 4 | ALL=(cardiovascular disease) | 566,161 |
| 5 | ALL=(heart disease) | 771,443 |
| 6 | ALL=(CVD) | 103,206 |
| 7 | ALL=(prevention) | 1,142,290 |
| 8 | ALL=(intervention) | 1,625,151 |
| 9 | ALL=(standard care) | 233,561 |
| 10 | ALL=(usual care) | 43,341 |
| 11 | ALL=(no intervention) | 464,220 |
| 12 | #1 OR #2 OR #3 | 68,030 |
| 13 | #4 OR #5 OR #6 | 1,122,227 |
| 14 | #7 OR #8 | 2,574,243 |
| 15 | #9 OR #10 OR #11 | 707,986 |
| 16 | #12 AND #13 AND #14 AND #15 | 306 |

Table 5. Cochrane Search

| ID | SEARCH | RESULT |
| --- | --- | --- |
| #1 | MeSH descriptor: [Cardiovascular Diseases] explode all trees | 154,938 |
| #2 | MeSH descriptor: [Cardiovascular Diseases] explode all trees | 154,938 |
| #3 | (Heart Diseases):ti,ab,kw | 19888 |
| #4 | (Vascular Diseases):ti,ab,kw | 8822 |
| #5 | (Cardiovascular System):ti,ab,kw | 15745 |
| #6 | (Cardio*):ti,ab,kw | 138439 |
| #7 | MeSH descriptor: [Text Messaging] explode all trees | 1609 |
| #8 | (Short Message Service):ti,ab,kw | 920 |
| #9 | (Cellular Phone):ti,ab,kw | 247 |
| #10 | (text messages):ti,ab,kw | 3872 |
| #11 | MeSH descriptor: [Primary Prevention] explode all trees | 6627 |
| #12 | (Risk Reduction Behavior):ti,ab,kw | 6232 |
| #13 | ( #1 OR #2 OR #3 OR #4 OR #5 OR #6) AND (#7 OR #8 OR #9 OR #10) AND (#11 OR #12) | 49 |

Table 6. CINAHL Search

| SEARCH | RESULT |
| --- | --- |
| CINAHL  ( (MH "Cardiovascular Diseases+") OR Cardiovascular Diseases OR (MH "Heart Diseases+") OR Heart Diseases OR (MH "Vascular Diseases+") OR Vascular Diseases OR (MH "Cardiovascular System+") OR Cardiovascular OR Cardio* OR Vascular) AND ( (MH "Text Messaging+") OR Text Messaging OR (MH "Short Message Service+") OR Short Message Service OR (MH "Cellular Phone+") OR Cellular Phone OR text OR messages) AND ( (MH "Prevention+") OR Prevention OR (MH "Risk Reduction Behavior+") OR Risk Reduction Behavior ) | 1121 |

Table 7. EMBASE Search

| No. | Query Results | RESULTS |
| --- | --- | --- |
| #1 | 'cardiovascular diseases'/exp | 5,767,832 |
| #2 | cardiovascular AND diseases:ab,ti | 220,537 |
| #3 | 'heart diseases'/exp | 2,560,671 |
| #4 | heart AND diseases:ab,ti | 198,758 |
| #5 | 'vascular diseases'/exp | 3,563,088 |
| #6 | vascular AND diseases:ab,ti | 112,549 |
| #7 | 'cardiovascular system'/exp | 2,333,660 |
| #8 | cardiovascular:ab,ti | 858,931 |
| #9 | cardio*:ab,ti | 1501676 |
| #10 | vascular:ab,ti | 992988 |
| #11 | #1 OR #2 OR #3 OR #4 OR #5 OR #6 OR #7 OR #8 OR #9 OR #10 | 7376162 |
| #12 | 'text messaging'/exp | 8164 |
| #13 | text AND messaging:ab,ti | 4729 |
| #14 | 'short message service'/exp | 134 |
| #15 | short AND message AND service:ab,ti | 1614 |
| #16 | 'cellular phone'/exp | 50698 |
| #17 | cellular AND phone:ab,ti | 1469 |
| #18 | text:ab,ti | 139704 |
| #19 | messages:ab,ti | 45935 |
| #20 | #12 OR #13 OR #14 OR #15 OR #16 OR #17 OR #18 OR #19 | 229140 |
| #21 | 'prevention'/exp | 1906323 |
| #22 | prevention:ab,ti | 935746 |
| #23 | 'risk reduction behavior'/exp | 134963 |
| #24 | risk AND reduction AND behavior:ab,ti | 9819 |
| #25 | #21 OR #22 OR #23 OR #24 | 2612674 |
| #26 | #11 AND #20 AND #25 | 3487 |

Table 8. Subgroup analysis DBP

| **Subgroup** | **k** | **MD (Mean Difference)** | **95%-CI (Confidence Interval)** | **I² (%)** | **Tau²** | **P-value (between groups)** |
| --- | --- | --- | --- | --- | --- | --- |
| **Risk of Bias** |  |  |  |  |  |  |
| - Some | 6 | -1.7612 | [-4.9354; 1.4129] | 89.9% | 13.6083 | 0.3449 |
| - Low | 4 | -3.4519 | [-4.9455; -1.9584] | 68.2% | 1.4796 |  |
| **Country** |  |  |  |  |  |  |
| - Canada | 1 | 1.0000 | [-1.2236; 3.2236] | -- | -- | < 0.0001 |
| - New Zealand | 1 | 3.0000 | [-0.8881; 6.8881] | -- | -- |  |
| - China | 1 | -1.4100 | [-5.9382; 3.1182] | -- | -- |  |
| - Australia | 2 | -2.3157 | [-2.5262; -2.1052] | 0% | 0 |  |
| - Nepal | 1 | -6.1000 | [-9.0763; -3.1237] | -- | -- |  |
| - UK | 1 | -4.5000 | [-7.2853; -1.7147] | -- | -- |  |
| - Turkey | 1 | -7.0500 | [-9.3832; -4.7168] | -- | -- |  |
| **Type of Transmission** |  |  |  |  |  |  |
| - One-way text messaging | 7 | -2.6288 | [-4.8385; -0.4190] | 85.8% | 7.5112 | 0.9829 |
| - Two-ways text messaging | 3 | -2.5678 | [-7.6820; 2.5464] | 86.3% | 18.0807 |  |
| **Type of SMS** |  |  |  |  |  |  |
| - Motivational/health messages | 2 | 0.5318 | [-1.4642; 2.5277] | 0% | 0 | < 0.0001 |
| - Lifestyle text messages | 2 | -1.4332 | [-4.5201; 1.6537] | 89.1% | 4.4216 |  |
| - Medication reminders/education | 2 | -6.6884 | [-8.5246; -4.8522] | 0% | 0 |  |
| **Frequency of SMS** |  |  |  |  |  |  |
| - Weekly | 3 | 0.2847 | [-0.9010; 1.4704] | 0% | 0 | < 0.0001 |
| - Daily | 1 | -4.5000 | [-7.2853; -1.7147] | -- | -- |  |
| - 2 per week | 1 | -7.0500 | [-9.3832; -4.7168] | -- | -- |  |
| **Who sends the message** |  |  |  |  |  |  |
| - Automated system | 8 | -2.5103 | [-4.5551; -0.4655] | 79.4% | 6.9024 | < 0.0001 |
| - Nurse-led | 1 | -7.0500 | [-9.3832; -4.7168] | -- | -- |  |
| - Not specified | 1 | 0.1500 | [-1.3240; 1.6240] | -- | -- |  |

Table 9. Leave-one-out analysis DBP

| **Author** | **Effect** | **Lower** | **Upper** | **I^2** | **RStudent** | **DFFITS** | **Cook's D** | **Cov. R** | **Tau^2 (del)** | **QE (del)** | **Hat** | **Weight** | **Is Influential** |
| --- | --- | --- | --- | --- | --- | --- | --- | --- | --- | --- | --- | --- | --- |
| Omitting Amand S, 2016 | -3.094 | -5.073 | -1.115 | 0.8458 | 1.3076 | 0.4507 | 0.1849 | 1.0177 | 7.4970 | 51.875 | 0.1038 | 10.3814 | No |
| Omitting Dale L, 2015a | -3.153 | -5.004 | -1.303 | 0.8499 | 1.8200 | 0.5284 | 0.2393 | 0.8900 | 6.6043 | 53.295 | 0.0815 | 8.1459 | No |
| Omitting Tam H, 2023 | -2.761 | -4.889 | -0.633 | 0.8674 | 0.3403 | 0.0938 | 0.0094 | 1.1767 | 9.2357 | 60.346 | 0.0731 | 7.3121 | No |
| Omitting Chow C, 2015 | -2.614 | -4.846 | -0.382 | 0.8657 | -0.1131 | -0.0462 | 0.0025 | 1.2943 | 9.8439 | 59.576 | 0.1129 | 11.2858 | No |
| Omitting Bhandari B, 2022 | -2.310 | -4.349 | -0.270 | 0.8526 | -1.1154 | -0.3574 | 0.1253 | 1.0807 | 8.1603 | 54.269 | 0.0939 | 9.3899 | No |
| Omitting Byrne J, 2020 | -2.462 | -4.615 | -0.309 | 0.8624 | -0.5774 | -0.1936 | 0.0406 | 1.2046 | 9.2284 | 58.131 | 0.0965 | 9.6491 | No |
| Omitting Klimis H, 2021 | -2.704 | -4.948 | -0.459 | 0.8670 | 0.1205 | 0.0366 | 0.0016 | 1.3090 | 9.9013 | 60.157 | 0.1196 | 11.9624 | No |
| Omitting Kes D, 2021 | -2.173 | -4.066 | -0.280 | 0.8205 | -1.6167 | -0.5368 | 0.2407 | 0.9310 | 6.7507 | 44.578 | 0.1024 | 10.2434 | No |
| Omitting Kiselev A, 2012 | -2.323 | -4.399 | -0.246 | 0.8458 | -0.9979 | -0.3403 | 0.1163 | 1.1208 | 8.4029 | 51.884 | 0.1041 | 10.4096 | No |
| Omitting Golshahi J, 2015 | -3.020 | -5.093 | -0.947 | 0.8384 | 1.0046 | 0.3579 | 0.1269 | 1.1166 | 8.2757 | 49.520 | 0.1122 | 11.2204 | No |

Table 10. Subgroup analysis SBP

| **Subgroup** | **k** | **MD (Mean Difference)** | **95%-CI (Confidence Interval)** | **I² (%)** | **Tau²** | **P-value (between groups)** |
| --- | --- | --- | --- | --- | --- | --- |
| **Risk of Bias** |  |  |  |  |  |  |
| - Some | 6 | -6.4897 | [-14.0486; 1.0692] | 97.5% | 83.5517 | 0.7739 |
| - Low | 5 | -5.3096 | [-8.0859; -2.5334] | 84.2% | 7.6472 |  |
| **Country** |  |  |  |  |  |  |
| - Australia | 2 | -5.6252 | [-10.0283; -1.2220] | 94.1% | 9.5266 | < 0.0001 |
| - Russia | 1 | -21.6000 | [-24.1669; -19.0331] | -- | -- |  |
| - Turkey | 1 | -13.1600 | [-16.6053; -9.7147] | -- | -- |  |
| **Type of Transmission** |  |  |  |  |  |  |
| - One-way text messaging | 7 | -5.4842 | [-9.3332; -1.6352] | 91.1% | 23.3340 | 0.7852 |
| - Two-ways text messaging | 4 | -6.9817 | [-17.0416; 3.0782] | 97.9% | 100.4020 |  |
| **Type of SMS** |  |  |  |  |  |  |
| - Lifestyle text messages | 2 | -4.4036 | [-11.4202; 2.6130] | 95.9% | 24.5899 | < 0.0001 |
| - Medication reminders & education | 2 | -12.0413 | [-15.0031; -9.0796] | 8.9% | 0.4449 |  |
| **Frequency of SMS** |  |  |  |  |  |  |
| - Weekly | 4 | -1.1926 | [-2.5087; 0.1236] | 0% | 0 | < 0.0001 |
| - 4 per week | 2 | -5.6252 | [-10.0283; -1.2220] | 94.1% | 9.5266 |  |
| - Daily+Extra | 1 | -21.6000 | [-24.1669; -19.0331] | -- | -- |  |
| **Who Sends the Message** |  |  |  |  |  |  |
| - Automated system | 8 | -6.4230 | [-11.6650; -1.1810] | 96.8% | 51.8873 | < 0.0001 |
| - Nurse-led | 1 | -13.1600 | [-16.6053; -9.7147] | -- | -- |  |

Table 11. Leave-one-out analysis SBP

| **Author** | **Effect** | **Lower** | **Upper** | **I^2** | **RStudent** | **DFFITS** | **Cook's D** | **Cov. R** | **Tau^2 (del)** | **QE (del)** | **Hat** | **Weight** | **Is Influential** |
| --- | --- | --- | --- | --- | --- | --- | --- | --- | --- | --- | --- | --- | --- |
| Omitting Amand S, 2016 | -6.841 | -11.145 | -2.536 | 0.9640 | 1.0842 | 0.3466 | 0.1177 | 1.0796 | 43.9072 | 250.052 | 0.0922 | 9.2207 | No |
| Omitting Dale L, 2015a | -6.738 | -11.058 | -2.418 | 0.9647 | 0.9954 | 0.2943 | 0.0866 | 1.0876 | 44.8858 | 254.612 | 0.0804 | 8.0402 | No |
| Omitting Tam H, 2023 | -6.253 | -10.730 | -1.775 | 0.9650 | 0.2320 | 0.0628 | 0.0042 | 1.1681 | 48.8415 | 256.871 | 0.0733 | 7.3280 | No |
| Omitting Chow C, 2015 | -5.904 | -10.483 | -1.325 | 0.9628 | -0.2787 | -0.0951 | 0.0100 | 1.2215 | 49.9380 | 242.110 | 0.0970 | 9.7038 | No |
| Omitting Bhandari B, 2022 | -5.734 | -10.223 | -1.244 | 0.9641 | -0.5527 | -0.1750 | 0.0327 | 1.1743 | 48.3423 | 250.687 | 0.0878 | 8.7797 | No |
| Omitting Byrne J, 2020 | -6.271 | -10.806 | -1.737 | 0.9650 | 0.2409 | 0.0705 | 0.0054 | 1.1982 | 49.4747 | 256.849 | 0.0864 | 8.6428 | No |
| Omitting Klimis H, 2021 | -6.393 | -10.957 | -1.828 | 0.9596 | 0.3903 | 0.1247 | 0.0172 | 1.2141 | 49.4795 | 222.548 | 0.0995 | 9.9465 | No |
| Omitting Kes D, 2021 | -5.394 | -9.717 | -1.070 | 0.9607 | -1.0745 | -0.3438 | 0.1168 | 1.0894 | 44.2880 | 228.948 | 0.0931 | 9.3134 | No |
| Omitting Kiselev A, 2012 | -4.493 | -7.427 | -1.560 | 0.8735 | -3.6274 | -1.1717 | 0.5893 | 0.5014 | 18.2854 | 71.165 | 0.0959 | 9.5882 | Yes |
| Omitting Golshahi J, 2015 | -6.681 | -11.114 | -2.248 | 0.9635 | 0.8057 | 0.2628 | 0.0715 | 1.1450 | 46.5175 | 246.290 | 0.0975 | 9.7535 | No |
| Omitting Bobrow K, 2014 | -6.527 | -11.033 | -2.021 | 0.9646 | 0.5846 | 0.1877 | 0.0378 | 1.1830 | 48.2426 | 254.477 | 0.0968 | 9.6832 | No |

Table 12. Subgroup analysis LDL

| **Subgroup** | **k** | **MD (Mean Difference)** | **95%-CI (Confidence Interval)** | **I² (%)** | **Tau²** | **P-value (between groups)** |
| --- | --- | --- | --- | --- | --- | --- |
| **Risk of Bias** |  |  |  |  |  |  |
| - Some | 1 | -7.7000 | [-17.3314; 1.9314] | -- | -- | 0.2098 |
| - Low | 3 | -1.2587 | [-4.1831; 1.6656] | 60.8% | 4.1701 |  |
| **Country** |  |  |  |  |  |  |
| - New Zealand | 1 | -7.7000 | [-17.3314; 1.9314] | -- | -- | 0.2098 |
| - Australia | 3 | -1.2587 | [-4.1831; 1.6656] | 60.8% | 4.1701 |  |
| **Type of Transmission** |  |  |  |  |  |  |
| - Two-ways text messaging | 2 | -2.6064 | [-9.7477; 4.5350] | 50.8% | 15.0731 | 0.9004 |
| - One-way text messaging | 2 | -2.0562 | [-6.8783; 2.7659] | 80.4% | 10.0461 |  |
| **Type of SMS** |  |  |  |  |  |  |
| - Comprehensive cardiac rehab | 1 | -7.7000 | [-17.3314; 1.9314] | -- | -- | 0.0248 |
| - Lifestyle text messages | 1 | -5.0000 | [-9.2369; -0.7631] | -- | -- |  |
| - Motivational and supportive | 2 | 0.0000 | [-0.9282; 0.9282] | 0% | 0 |  |
| **Frequency of SMS** |  |  |  |  |  |  |
| - Decreasing | 2 | -2.6064 | [-9.7477; 4.5350] | 50.8% | 15.0731 | 0.9004 |
| - 4 per week | 2 | -2.0562 | [-6.8783; 2.7659] | 80.4% | 10.0461 |  |
| **Who Sends the Message** |  |  |  |  |  |  |
| - Automated system | 4 | -1.8535 | [-4.9111; 1.2042] | 59.4% | 5.3214 | -- |

Table 13. leave-one-out analysis LDL

| **Author** | **Effect** | **Lower** | **Upper** | **I^2** | **RStudent** | **DFFITS** | **Cook's D** | **Cov. R** | **Tau^2 (del)** | **QE (del)** | **Hat** | **Weight** | **Is Influential** |
| --- | --- | --- | --- | --- | --- | --- | --- | --- | --- | --- | --- | --- | --- |
| Omitting Dale L, 2015a | -1.259 | -4.183 | 1.666 | 0.6082 | -1.1655 | -0.3889 | 0.1453 | 0.9147 | 4.1701e+00 | 5.1049 | 0.0826 | 8.2585 | No |
| Omitting Chow C, 2015 | -0.071 | -0.995 | 0.853 | 0.1779 | -2.2278 | -1.6711 | 1.3057 | 0.0913 | 5.1091e-06 | 2.4327 | 0.2435 | 24.3509 | Yes |
| Omitting Klimis H, 2021 | -3.332 | -7.572 | 0.908 | 0.4400 | 0.9980 | 0.8785 | 0.8981 | 1.9229 | 6.2318e+00 | 3.5711 | 0.4380 | 43.8020 | Yes |
| Omitting Chow C, 2022 | -2.921 | -7.404 | 1.562 | 0.7289 | 0.6451 | 0.5624 | 0.4680 | 2.1497 | 1.0272e+01 | 7.3779 | 0.2359 | 23.5886 | Yes |

Table 14.-Subgroup analysis Total cholesterol

| **Subgroup** | **k** | **MD (Mean Difference)** | **95%-CI (Confidence Interval)** | **I² (%)** | **Tau²** | **P-value (between groups)** |
| --- | --- | --- | --- | --- | --- | --- |
| **Risk of Bias** |  |  |  |  |  |  |
| - Some | 1 | -7.8000 | [-20.3627; 4.7627] | -- | -- | 0.5942 |
| - Low | 4 | -3.9389 | [-10.5693; 2.6915] | 92.0% | 37.8120 |  |
| **Country** |  |  |  |  |  |  |
| - New Zealand | 1 | -7.8000 | [-20.3627; 4.7627] | -- | -- | 0.4773 |
| - Australia | 3 | -2.5881 | [-10.2378; 5.0617] | 93.2% | 40.8918 |  |
| - UK | 1 | -9.6700 | [-18.6854; -0.6546] | -- | -- |  |
| **Type of Transmission** |  |  |  |  |  |  |
| - Two-ways text messaging | 3 | -5.7015 | [-10.0787; -1.3243] | 0.0% | 0 | 0.6142 |
| - One-way text messaging | 2 | -2.2542 | [-14.9237; 10.4152] | 95.5% | 79.9725 |  |
| **Type of SMS** |  |  |  |  |  |  |
| - Comprehensive cardiac rehab | 1 | -7.8000 | [-20.3627; 4.7627] | -- | -- | 0.1976 |
| - Lifestyle text messages | 1 | -9.0000 | [-14.3020; -3.6980] | -- | -- |  |
| - Medication reminders & motivation | 1 | -9.6700 | [-18.6854; -0.6546] | -- | -- |  |
| - Motivational & supportive | 2 | 0.5314 | [-7.0429; 8.1057] | 86.9% | 26.3725 |  |
| **Frequency of SMS** |  |  |  |  |  |  |
| - Decreasing | 2 | -4.4774 | [-9.4844; 0.5295] | 0.0% | 0 | 0.5412 |
| - 4 per week | 2 | -2.2542 | [-14.9237; 10.4152] | 95.5% | 79.9725 |  |
| - Daily | 1 | -9.6700 | [-18.6854; -0.6546] | -- | -- |  |
| **Who Sends the Message** |  |  |  |  |  |  |
| - Automated system | 5 | -4.3317 | [-10.2012; 1.5378] | 90.1% | 32.9749 | -- |

Table 15. Leave-one-out analysis Total cholesterol

| **RStudent** | **DFFITS** | **Cook's D** | **Cov. R** | **Tau^2 (del)** | **QE (del)** | **Hat** | **Weight** | **Is Influential** | **HetContrib** | **InfluenceEffectSize** |
| --- | --- | --- | --- | --- | --- | --- | --- | --- | --- | --- |
| Omitting Dale L, 2015a | -3.939 | -10.569 | 2.691 | 0.9199 | -0.4062 | -0.1271 | 0.0172 | 1.2761 | 37.8120 | 37.463 | 0.1211 | 12.1096 | No | 3.0041 | 0.0125 |
| Omitting Chow C, 2015 | -3.002 | -9.677 | 3.673 | 0.8444 | -0.8308 | -0.4427 | 0.1971 | 1.2933 | 33.2075 | 19.280 | 0.2226 | 22.2576 | No | 20.7060 | 0.4935 |
| Omitting Byrne J, 2020 | -3.302 | -9.852 | 3.248 | 0.9076 | -0.7787 | -0.3390 | 0.1182 | 1.2453 | 34.5468 | 32.452 | 0.1657 | 16.5671 | No | 7.9625 | 0.0646 |
| Omitting Klimis H, 2021 | -7.066 | -10.618 | -3.514 | 0.0000 | 5.2315 | 4.9206 | 0.8336 | 0.3662 | 0.9607 | 2.178 | 0.2705 | 27.0488 | Yes | 2.1996 | 36.1020 |
| Omitting Chow C, 2022 | -4.735 | -12.268 | 2.799 | 0.9110 | 0.1075 | 0.1180 | 0.0181 | 1.6474 | 45.2421 | 33.724 | 0.2202 | 22.0169 | No | 6.6069 | 0.1483 |

Table16. Subgroup analysis BMI

| **Subgroup** | **k** | **MD (Mean Difference)** | **95%-CI (Confidence Interval)** | **I² (%)** | **Tau²** | **P-value (between groups)** |
| --- | --- | --- | --- | --- | --- | --- |
| **Risk of Bias** |  |  |  |  |  |  |
| - Some | 1 | 2.2000 | [0.4576; 3.9424] | -- | -- | 0.0040 |
| - Low | 4 | -0.5455 | [-1.2305; 0.1394] | 96.3% | 0.3940 |  |
| **Country** |  |  |  |  |  |  |
| - New Zealand | 1 | 2.2000 | [0.4576; 3.9424] | -- | -- | 0.0172 |
| - Australia | 3 | -0.5884 | [-1.4152; 0.2384] | 97.5% | 0.4993 |  |
| - UK | 1 | -0.3100 | [-1.6290; 1.0090] | -- | -- |  |
| **Type of Transmission** |  |  |  |  |  |  |
| - Two-ways text messaging | 3 | 0.2776 | [-1.3336; 1.8887] | 77.7% | 1.6253 | 0.4210 |
| - One-way text messaging | 2 | -0.5913 | [-1.9631; 0.7806] | 98.7% | 0.9671 |  |
| **Type of SMS** |  |  |  |  |  |  |
| - Comprehensive cardiac rehab | 1 | 2.2000 | [0.4576; 3.9424] | -- | -- | < 0.0001 |
| - Lifestyle text messages | 1 | -1.3000 | [-1.6106; -0.9894] | -- | -- |  |
| - Medication reminders & motivation | 1 | -0.3100 | [-1.6290; 1.0090] | -- | -- |  |
| - Motivational & supportive | 2 | -0.1898 | [-0.8655; 0.4860] | 82.5% | 0.2022 |  |
| **Frequency of SMS** |  |  |  |  |  |  |
| - Decreasing | 2 | 0.6741 | [-2.0588; 3.4069] | 88.8% | 3.4824 | 0.7194 |
| - 4 per week | 2 | -0.5913 | [-1.9631; 0.7806] | 98.7% | 0.9671 |  |
| - Daily | 1 | -0.3100 | [-1.6290; 1.0090] | -- | -- |  |
| **Who Sends the Message** |  |  |  |  |  |  |
| - Automated system | 5 | -0.1748 | [-1.1225; 0.7729] | 95.4% | 0.9639 | -- |

Table 17. leave-one-out analysis BMI

| **Author** | **Effect** | **Lower** | **Upper** | **I^2** | **RStudent** | **DFFITS** | **Cook's D** | **Cov. R** | **Tau^2 (del)** | **QE (del)** | **Hat** | **Weight** | **Is Influential** |
| --- | --- | --- | --- | --- | --- | --- | --- | --- | --- | --- | --- | --- | --- |
| Omitting Dale L, 2015a | -0.545539975 | -1.2304659 | 0.1393859 | 0.9632086 | 2.4020894 | 0.93325741 | 0.5880174822 | 0.5223459 | 0.3939911 | 81.54078 | 0.1332800 | 13.32800 | Yes |
| Omitting Chow C, 2015 | 0.124104049 | -0.7818366 | 1.0300447 | 0.7433860 | -1.5382121 | -0.76627686 | 0.3820555133 | 0.9138409 | 0.6183760 | 11.69071 | 0.2363998 | 23.63998 | No |
| Omitting Byrne J, 2020 | -0.088346324 | -1.3427064 | 1.1660138 | 0.9655295 | -0.1452780 | -0.15359859 | 0.0319428186 | 1.7519251 | 1.4653161 | 87.03106 | 0.1650175 | 16.50175 | No |
| Omitting Klimis H, 2021 | -0.188583351 | -1.5129927 | 1.1358260 | 0.8455585 | 0.2043997 | 0.02264248 | 0.0008168408 | 1.9530599 | 1.5360801 | 19.42483 | 0.2423953 | 24.23953 | No |
| Omitting Chow C, 2022 | 0.006576899 | -1.2917418 | 1.3048956 | 0.9634843 | -0.4270377 | -0.30568032 | 0.1406562953 | 1.8768678 | 1.4938454 | 82.15645 | 0.2229073 | 22.29073 | No |
